# Supplementary material
Source: PubMed Central journal article supplement (PMC1794688)
Supplement: 7400829-s2.pdf [file 7400829-s2.pdf]

## Supporting Information

### Materials and Methods

**Plasmids.** Plasmids are listed in Table S2. All clones were based on pLP1392, an *HST2* clone flanked by 400 bases of genomic sequence upstream and 300 bases downstream of the ORF in vector pRS313. 2 $\mu$  constructs are based in pRS423. Truncation mutants were created by PCR sewing and confirmed by sequencing the full length of the clone. *HST2-NES*, *HST2\**, and *HST2\*-NES* plasmids were constructed using site-directed mutagenesis (Wang and Malcolm, 1999). The *HST2-NES* lesions were specifically designed to maintain the sequence of helix  $\alpha$ -13 (a.a. 303-314), while disrupting the two most highly conserved leucine residues in the NES, with the mutations L315A and L317A. The *HST2\** lesion (H135Y) is directly analogous to the canonical, catalytically inactive *SIR2* allele, *sir2H364Y*. All clones have been verified to express the intended product as detected by protein immunoblotting with anti-Hst2 serum 663-4.

**Dilution assays.** For cycloheximide assays, YPD or synthetic medium lacking histidine was prepared using 250 ng/ml or 500 ng/ml cycloheximide (Sigma, St. Louis, MO) as a final concentration. For rDNA assays, synthetic medium lacking histidine or histidine and uracil was prepared (Sigma, St. Louis, MO). Cells were grown to saturation in liquid culture lacking drugs at 30°C, and then plated as five-fold serial dilutions on solid media using a pinning tool. These plates were grown at 30°C or 37°C for up to 10 days, with digital images captured at two-day intervals.

**Immunofluorescence microscopy.** *hst2A* strain LPY6623 was transformed with plasmids bearing *HST2* or mutant constructs. Leptomycin B (KOSAN Biosciences, Inc., Hayward, CA), when used, was dissolved in 100% ethanol added to exponentially growing cultures at a final concentration of 100 ng/ml followed by a one-hour incubation at 30°C.

Immunofluorescence was performed as described (Garcia and Pillus, 2002; Stone and Pillus, 1996) using a 1:200 dilution of 663-4 anti-Hst2 serum. Fluorescein-conjugated anti-rabbit secondary antibodies (Jackson ImmunoResearch, West Grove, PA) were preadsorbed against spheroplasted yeast cells. Some cell-to-cell variability was observed in the intensity of Hst2 staining. This may be due to technical reasons such as variability in the degree of spheroplasting or for biological reasons such as differences in expression throughout the cell cycle. Microscopy was performed on an Applied Precision optical sectioning microscope to collect images spaced at 0.2- $\mu$ m increments. The images were deconvolved using the Delta Vision deconvolution software as previously described (Rubio and Pogliano, 2004).

**Yeast extracts.** Strains were grown to log phase in liquid medium at 30°C, then harvested by centrifugation. Pellets were resuspended at a density of 5  $\mu$ l/OD600 in YEB-100 buffer (40 mM HEPES pH 7.5; 100 mM NaCl; 10% glycerol; 0.1% Tween-20) with protease inhibitors. Cells were lysed by vortexing with glass beads at 4°C by four intervals of four minutes followed by two minutes on ice. Crude lysate was cleared by sedimenting five minutes at 14,000 rpm in a microfuge at 4°C. For biochemical analysis, lysates were further cleared by two 30-minute microfuge runs at 14,000 rpm at 4°C.

**Chromatography.** 50  $\mu$ g total protein in 200  $\mu$ l YEB-100 was fractionated over a Superdex 200 10/30 gel filtration column (Amersham Biosciences). 50  $\mu$ l of each 250  $\mu$ l fraction was assayed by immunoblotting.

**Immunoblotting.** Samples were subjected to electrophoresis on 9% acrylamide gels, and then transferred to nitrocellulose at 100V for 1 hour. Blots were pre-incubated with TBSTM (150 mM NaCl, 10 mM Tris, pH 8.0, 0.05% Tween 20, 2% powdered skim milk) for 15 minutes at room temperature. Cleared 663-4 anti-Hst2 serum was used as primary antiserum at a dilution

of 1:3000 in TBSTM, incubating at 4°C overnight. Horseradish peroxidase-conjugated goat anti-rabbit secondary antiserum (Promega, Madison, WI) was used at a dilution of 1:10,000 for one hour at room temperature. Signal was developed using Western Lightning Chemiluminescence Reagent Plus (Perkin Elmer, Boston, MA) on X-OMAT film (Eastman Kodak Co., Rochester, NY).

**Supplementary Table 1**  
Yeast strains used in this study.  
All strains created for this study.

| Strain   | Genotype                                                                                                                                                                                                                  | Plasmid            | Figure  |
|----------|---------------------------------------------------------------------------------------------------------------------------------------------------------------------------------------------------------------------------|--------------------|---------|
| LPY02446 | <i>MAT<math>\alpha</math> his3<math>\Delta</math>200 leu2<math>\Delta</math>1 ura3-167 rDNA::mURA3</i>                                                                                                                    | none               |         |
| LPY06497 | <i>MAT<math>\alpha</math> his3<math>\Delta</math>1 leu2<math>\Delta</math>0 lys2<math>\Delta</math>0 MET15 ura3<math>\Delta</math>0</i>                                                                                   | none               | 3A      |
| LPY06621 | <i>MAT<math>\alpha</math> his3<math>\Delta</math>1 leu2<math>\Delta</math>0 lys2<math>\Delta</math>0 met15<math>\Delta</math>0 ura3<math>\Delta</math>0 hst2<math>\Delta</math>::kanMX</i>                                | none               | 3A      |
| LPY06623 | <i>MAT<math>\alpha</math> his3<math>\Delta</math>1 leu2<math>\Delta</math>0 lys2<math>\Delta</math>0 MET15 ura3<math>\Delta</math>0 hst2<math>\Delta</math>::kanMX</i>                                                    | none               |         |
| LPY08082 | LPY06497                                                                                                                                                                                                                  | pLP60              | 3B      |
| LPY08083 | LPY06497                                                                                                                                                                                                                  | pLP1392            | 3B      |
| LPY08085 | LPY06497                                                                                                                                                                                                                  | pLP1720            | 3B      |
| LPY08086 | LPY06497                                                                                                                                                                                                                  | pLP359             | 3B, 3C, |
| LPY08087 | LPY06497                                                                                                                                                                                                                  | pLP1723            | 3B, 3C, |
| LPY08089 | LPY06497                                                                                                                                                                                                                  | pLP1721            | 3B      |
| LPY08090 | LPY06623                                                                                                                                                                                                                  | pLP60              | S1      |
| LPY08091 | LPY06623                                                                                                                                                                                                                  | pLP1392            | S1      |
| LPY08092 | LPY06623                                                                                                                                                                                                                  | pLP1695            | S1      |
| LPY08094 | LPY06623                                                                                                                                                                                                                  | pLP359             | 2B      |
| LPY08095 | LPY06623                                                                                                                                                                                                                  | pLP1723            | 2B      |
| LPY08097 | LPY06623                                                                                                                                                                                                                  | pLP1721            | 2B      |
| LPY10858 | <i>MAT<math>\alpha</math> his3<math>\Delta</math>1 leu2<math>\Delta</math>0 lys2<math>\Delta</math>0 met15<math>\Delta</math>0 ura3<math>\Delta</math>0 crm1<math>\Delta</math>::kanMX hst2<math>\Delta</math>::natMX</i> | pLP1723,<br>BT1602 | 1       |
| LPY10860 | <i>MAT<math>\alpha</math> his3<math>\Delta</math>1 leu2<math>\Delta</math>0 lys2<math>\Delta</math>0 MET15 ura3<math>\Delta</math>0 crm1<math>\Delta</math>::kanMX hst2<math>\Delta</math>::natMX</i>                     | pLP1723,<br>BT1603 | 1       |
| LPY10864 | LPY06497                                                                                                                                                                                                                  | pLP1985            | 3B, 3C  |
| LPY10865 | LPY06497                                                                                                                                                                                                                  | pLP1986            | 3B      |
| LPY10867 | LPY06623                                                                                                                                                                                                                  | pLP1985            | 1       |
| LPY11795 | LPY06497                                                                                                                                                                                                                  | pLP2110            | 3C      |

|          |          |         |    |
|----------|----------|---------|----|
| LPY11796 | LPY06497 | pLP2111 | 3C |
| LPY11911 | LPY02446 | pLP359  | 3D |
| LPY11912 | LPY02446 | pLP1723 | 3D |
| LPY11913 | LPY02446 | pLP2110 | 3D |
| LPY11914 | LPY02446 | pLP1721 | 3D |
| LPY11915 | LPY02446 | pLP1985 | 3D |
| LPY11916 | LPY02446 | pLP2111 | 3D |

**Supplementary Table 2**  
Plasmids used in this study

| Plasmid | Genotype                                                                  | Source                     |
|---------|---------------------------------------------------------------------------|----------------------------|
| pLP60   | <i>HIS3 Amp<sup>R</sup> CEN</i>                                           | Sikorski and Hieter, 1989  |
| pLP359  | <i>HIS3 Amp<sup>R</sup> 2<math>\mu</math></i>                             | Christianson, et al., 1992 |
| pLP1392 | <i>HST2 HIS3 Amp<sup>R</sup> CEN</i>                                      | this study                 |
| pLP1695 | <i>hst2-<math>\Delta</math>N6 HIS3 Amp<sup>R</sup> CEN</i>                | this study                 |
| pLP1720 | <i>HST2-<math>\Delta</math>298 HIS3 Amp<sup>R</sup> CEN</i>               | this study                 |
| pLP1721 | <i>HST2-<math>\Delta</math>298 HIS3 Amp<sup>R</sup> 2<math>\mu</math></i> | this study                 |
| pLP1723 | <i>HST2 HIS3 Amp<sup>R</sup> 2<math>\mu</math></i>                        | this study                 |
| pLP1985 | <i>HST2-NES HIS3 Amp<sup>R</sup> 2<math>\mu</math></i>                    | this study                 |
| pLP1986 | <i>HST2-NES HIS3 Amp<sup>R</sup> CEN</i>                                  | this study                 |
| pLP2110 | <i>HST2* HIS3 Amp<sup>R</sup> 2<math>\mu</math></i>                       | this study                 |
| pLP2111 | <i>HST2*-NES HIS3 Amp<sup>R</sup> 2<math>\mu</math></i>                   | this study                 |
| BT1602  | <i>CRM1 LEU2 Amp<sup>R</sup> CEN</i>                                      | Neville and Rosbash, 1999  |
| BT1603  | <i>CRMIT539C LEU2 Amp<sup>R</sup> CEN</i>                                 | Neville and Rosbash, 1999  |

**Figure S1.** Hst2 appears largely monomeric and has a higher molecular weight form. Cleared yeast lysate containing 50  $\mu$ g total protein was fractionated with Superdex 200 gel filtration. Hst2 was identified by immunoblotting with anti-Hst2 serum.

**Accession numbers** The GenBank accession numbers of proteins sequences discussed in this paper are: *ScHst2* GI:6325242; *HsSIRT2* GI:24474785; *MmSIRT2* GI:38258618; *RnSIRT2* GI:56605812; *XlSIRT2* GI:55250553; *DrSIRT2* GI:68364282.

## Supplementary References

- Garcia, S.N. and Pillus, L. (2002) A unique class of conditional *sir2* mutants displays distinct silencing defects in *Saccharomyces cerevisiae*. *Genetics*, **162**, 721-736.
- Rubio, A. and Pogliano, K. (2004) Septal localization of forespore membrane proteins during engulfment in *Bacillus subtilis*. *EMBO J*, **23**, 1636-1646.
- Stone, E.M. and Pillus, L. (1996) Activation of an MAP kinase cascade leads to Sir3p hyperphosphorylation and strengthens transcriptional silencing. *J Cell Biol*, **135**, 571-583.
- Wang, W. and Malcolm, B.A. (1999) Two-stage PCR protocol allowing introduction of multiple mutations, deletions and insertions using QuikChange Site-Directed Mutagenesis. *Biotechniques*, **26**, 680-682.
- Zhao, K., Chai, X., Clements, A. and Marmorstein, R. (2003) Structure and autoregulation of the yeast Hst2 homolog of Sir2. *Nat Struct Biol*, **10**, 864-871.
